# Supplementary material
Source: publisher figshare collection journal article supplement (https://acs.figshare.com/ndownloader/files/33877062)
Supplement: Supplementary file 1 [file 33877062]

47
3 ground state, PBE0/6-311*
 Pt                -0.97681500    0.16808400   -0.38373300
 C                 -4.68329900    1.50881800    0.67312500
 H                 -5.72399700    1.23822600    0.72811900
 C                 -2.41535200   -2.45656900   -1.09336400
 C                 -3.56528700   -3.23819900   -1.19954100
 C                 -4.80546700   -2.72842900   -0.83870300
 H                 -3.48778400   -4.25639700   -1.56975100
 N                 -3.71034000    0.65832400    0.20524100
 C                 -2.48424200    1.24494700    0.24354200
 C                 -2.47306800   -1.14583600   -0.62659700
 N                 -2.70354600    2.47839000    0.74654500
 C                 -4.90354100   -1.42391600   -0.36394600
 C                 -3.74651500   -0.67213900   -0.26919100
 C                 -1.67861700    3.47619900    0.96422500
 H                 -0.87859000    3.06131100    1.57566200
 H                 -1.26018200    3.80524300    0.01188800
 H                 -2.12369600    4.32893400    1.47543600
 H                 -1.45811900   -2.88194900   -1.37927500
 C                 -4.04981100    2.65619300    1.01301500
 H                 -4.43300000    3.57789900    1.41880000
 S                  0.92898300    1.73402700   -0.11420900
 S                  0.77539600   -1.29942700   -1.17648000
 P                  1.97060600   -0.00645300   -0.16448300
 C                  2.29964700   -0.60004000    1.52025100
 C                  3.38315000   -0.08399400    2.23267100
 C                  1.42680300   -1.49966200    2.12781400
 C                  3.59532500   -0.47715200    3.54650600
 H                  4.05956000    0.62218300    1.76116000
 C                  1.64371800   -1.88586600    3.44368500
 H                  0.58202700   -1.88664500    1.56738900
 C                  2.72673600   -1.37876300    4.15223300
 H                  4.44068800   -0.07849400    4.09842200
 H                  0.96375300   -2.58806000    3.91537100
 H                  2.89491500   -1.68578400    5.17989700
 C                  3.60726300    0.17305600   -0.91754100
 C                  4.53749900   -0.86155400   -0.79713600
 C                  3.90828100    1.30390600   -1.67187400
 C                  5.76812800   -0.75622600   -1.42775600
 H                  4.29877600   -1.74245000   -0.20878200
 C                  5.14603500    1.40571300   -2.29447200
 H                  3.17098400    2.09460200   -1.76876900
 C                  6.07355000    0.37843000   -2.17338700
 H                  6.49200100   -1.55962100   -1.33600600
 H                  5.38417600    2.28867800   -2.87884700
 H                  7.03866000    0.45920200   -2.66380200
 H                 -5.86814300   -1.01508000   -0.07702700
 H                 -5.69799300   -3.33969200   -0.92426000

47 
3 triplet state, PBE0/6-311* 
 Pt                -0.97133100    0.22303300   -0.37515800
 C                 -4.68967000    1.39821300    0.89291600
 H                 -5.73082200    1.12945200    0.93353100
 C                 -2.35829600   -2.27804000   -1.41821700
 C                 -3.48807300   -3.03696500   -1.62529300
 C                 -4.78336600   -2.56435200   -1.18512300
 H                 -3.41958100   -3.99921600   -2.12070400
 N                 -3.72326900    0.60122000    0.29077400
 C                 -2.46092400    1.21272900    0.39640300
 C                 -2.41317400   -1.03062800   -0.77613700
 N                 -2.70131300    2.37427300    1.07918600
 C                 -4.92116200   -1.36657600   -0.55111400
 C                 -3.76126700   -0.58956900   -0.33093300
 C                 -1.68696800    3.33821300    1.42380700
 H                 -0.91154900    2.87023700    2.03188600
 H                 -1.22543300    3.74459000    0.52087000
 H                 -2.14826900    4.14989800    1.98575300
 H                 -1.39635900   -2.65121800   -1.75534400
 C                 -4.03646300    2.48548100    1.37244700
 H                 -4.42564100    3.33896900    1.90510500
 S                  0.93019300    1.73518000    0.12410700
 S                  0.80865900   -1.08725300   -1.42112700
 P                  1.96782400    0.01554000   -0.17710000
 C                  2.24519300   -0.83770800    1.40152700
 C                  3.27055600   -0.40350900    2.24282200
 C                  1.39310200   -1.86250300    1.80523100
 C                  3.44629800   -1.00295100    3.48189000
 H                  3.92960200    0.40039600    1.92938900
 C                  1.57267900   -2.45497700    3.04849700
 H                  0.59305500   -2.18239700    1.14603500
 C                  2.59776800   -2.02897800    3.88471700
 H                  4.24656900   -0.66821400    4.13431400
 H                  0.90805400   -3.25311800    3.36335000
 H                  2.73643500   -2.49653700    4.85470200
 C                  3.62623900    0.31042600   -0.83979400
 C                  4.57102700   -0.71754300   -0.81440600
 C                  3.93280300    1.53128300   -1.43553400
 C                  5.82085300   -0.51678100   -1.38142300
 H                  4.32854400   -1.66781500   -0.34849200
 C                  5.18914300    1.72761600   -1.99438900
 H                  3.18543100    2.31807300   -1.45989800
 C                  6.13086500    0.70611500   -1.96830800
 H                  6.55609300   -1.31488100   -1.36312100
 H                  5.43119900    2.68021300   -2.45459200
 H                  7.11083800    0.86131400   -2.40881400
 H                 -5.89592300   -1.01802100   -0.22418000
 H                 -5.65832600   -3.18068900   -1.36591500

56 
4 ground state, PBE0/6-311*
 Pt                 0.15885800    0.49065900   -0.41472300
 C                 -3.09429600    2.84738200    0.33549800
 H                 -4.16563000    2.82384200    0.43447700
 C                 -1.86352800   -1.82720800   -0.59645300
 C                 -3.14929100   -2.35498200   -0.55713800
 C                 -4.22511900   -1.50482000   -0.31097200
 H                 -3.30907000   -3.41694100   -0.71701600
 N                 -2.35752900    1.72049200    0.05071700
 C                 -1.02770000    1.99928900   -0.02241500
 C                 -1.60794400   -0.46320100   -0.39882600
 N                 -0.93989600    3.32217600    0.22432500
 C                 -3.98290600   -0.14086400   -0.10846300
 C                 -2.70592000    0.37482800   -0.14855300
 C                  0.29341800    4.07860400    0.24494100
 H                  1.00410500    3.61373000    0.92674100
 H                  0.73349000    4.11575600   -0.75273300
 H                  0.07636500    5.09199700    0.58008800
 H                 -1.02998000   -2.49601100   -0.78463400
 C                 -2.19879400    3.85718300    0.44321200
 H                 -2.34194400    4.90374400    0.65538500
 S                  2.37484900    1.59080300   -0.45411200
 S                  1.49293400   -1.46960200   -0.88829500
 P                  2.99508700   -0.31818000   -0.15086300
 C                  3.25298700   -0.63056800    1.61922900
 C                  4.45328800   -0.24519100    2.21818200
 C                  2.22736600   -1.17190500    2.39079900
 C                  4.62691900   -0.41204100    3.58479600
 H                  5.25003400    0.18286800    1.61777000
 C                  2.40732000   -1.33273900    3.75807300
 H                  1.29487400   -1.45855600    1.91571900
 C                  3.60492800   -0.95662900    4.35502500
 H                  5.56219800   -0.11594300    4.04923800
 H                  1.60800700   -1.75590200    4.35798100
 H                  3.74303000   -1.08699500    5.42391000
 C                  4.59475800   -0.67065500   -0.92079600
 C                  5.27647200   -1.84249800   -0.58564600
 C                  5.10466500    0.18508400   -1.89366100
 C                  6.46983300   -2.14922400   -1.22208100
 H                  4.87521100   -2.50774800    0.17296600
 C                  6.30461200   -0.12498900   -2.52124000
 H                  4.55785400    1.08565100   -2.15471200
 C                  6.98536500   -1.28912300   -2.18698600
 H                  7.00071500   -3.05980600   -0.96359900
 H                  6.70617400    0.54332800   -3.27614300
 H                  7.92111600   -1.53045300   -2.68151500
 O                 -5.13786300    0.55961100    0.12364100
 C                 -5.65942400   -1.64991200   -0.19291800
 C                 -6.56042800   -2.70876700   -0.28026600
 C                 -6.15086600   -0.36346000    0.07044400
 C                 -7.91280400   -2.44955500   -0.10278300
 H                 -6.21236100   -3.71642400   -0.48365000
 C                 -7.49061400   -0.08318100    0.25013100
 C                 -8.37172300   -1.15581900    0.15864500
 H                 -8.62732400   -3.26369200   -0.16817700
 H                 -7.83274100    0.92566000    0.45187800
 H                 -9.43441500   -0.98186200    0.29276200

56 
4 triplet state, PBE0/6-311*
 Pt                 0.15760100    0.50854200   -0.41338900
 C                 -3.08517100    2.86742900    0.43473400
 H                 -4.15567400    2.85652100    0.54168200
 C                 -1.82874000   -1.80492200   -0.66844600
 C                 -3.09661900   -2.33579200   -0.64609500
 C                 -4.22130200   -1.45663500   -0.35734300
 H                 -3.26859400   -3.38868100   -0.83635800
 N                 -2.36477000    1.73100300    0.11027100
 C                 -1.01355900    2.00873000    0.03339300
 C                 -1.55862900   -0.44159500   -0.42689200
 N                 -0.92117000    3.33083000    0.31939700
 C                 -3.98831700   -0.09711200   -0.10741400
 C                 -2.72774400    0.43630800   -0.12657500
 C                  0.31426700    4.07883900    0.35692100
 H                  1.00485900    3.62868300    1.06969100
 H                  0.78195500    4.08837100   -0.62917600
 H                  0.09476500    5.10206300    0.65931400
 H                 -0.99112400   -2.46200600   -0.87944200
 C                 -2.17285300    3.85928400    0.56213200
 H                 -2.30826600    4.90054700    0.80575300
 S                  2.38138200    1.60587200   -0.39793200
 S                  1.50798400   -1.42962500   -0.99882200
 P                  2.98705000   -0.31905400   -0.16664600
 C                  3.19575600   -0.70874000    1.59409900
 C                  4.36088400   -0.30934500    2.25059400
 C                  2.16879500   -1.32793300    2.30227400
 C                  4.49856600   -0.53963600    3.61193500
 H                  5.15799700    0.17928700    1.69865500
 C                  2.31236600   -1.55153400    3.66538600
 H                  1.26380700   -1.62414800    1.78231000
 C                  3.47483300   -1.16121300    4.31948500
 H                  5.40650400   -0.23292800    4.12151500
 H                  1.51187700   -2.03413900    4.21686400
 H                  3.58441500   -1.34052300    5.38459200
 C                  4.60723700   -0.63584400   -0.90738900
 C                  5.29838200   -1.80387500   -0.57851300
 C                  5.12539200    0.24420400   -1.85422600
 C                  6.50879500   -2.08295900   -1.19553300
 H                  4.89130900   -2.48745900    0.16033000
 C                  6.34197900   -0.03823200   -2.46201800
 H                  4.57219500    1.14224700   -2.11046700
 C                  7.03184200   -1.19906100   -2.13426900
 H                  7.04707800   -2.99051400   -0.94177800
 H                  6.74976400    0.64900600   -3.19629900
 H                  7.98083800   -1.41874000   -2.61340700
 O                 -5.15373700    0.57816100    0.15029800
 C                 -5.61402000   -1.63098000   -0.24740700
 C                 -6.50343300   -2.71847900   -0.37379200
 C                 -6.14980400   -0.35397000    0.06565600
 C                 -7.85332300   -2.48862700   -0.18699500
 H                 -6.13332300   -3.70966100   -0.61273700
 C                 -7.48908400   -0.11467100    0.25318900
 C                 -8.34707100   -1.21180500    0.12149600
 H                 -8.55280600   -3.31338600   -0.28076400
 H                 -7.85762200    0.87669700    0.49094700
 H                 -9.41352800   -1.07077100    0.26046200

69 
7 ground state, PBE0/6-311*
 Pt                 1.21138800   -0.03880600   -0.10251400
 C                  4.90097900   -1.64414700   -0.76957700
 H                  5.95955400   -1.49125300   -0.64363100
 C                  2.73523800    2.32471800    1.11209900
 C                  3.90769200    2.93803300    1.55246500
 C                  5.14154200    2.32415600    1.37810700
 H                  3.85230000    3.90849800    2.03747600
 H                  6.05059900    2.80685700    1.72231500
 N                  3.95469000   -0.77263300   -0.28416500
 C                  2.69612700   -1.19576900   -0.58398000
 C                  2.76238500    1.08445900    0.47517900
 N                  2.87031900   -2.34177100   -1.28032700
 C                  5.20955700    1.07594200    0.76620700
 C                  4.03127900    0.49301800    0.33640400
 C                  1.80990800   -3.11146000   -1.89307900
 H                  1.57908300   -4.00277900   -1.30788000
 H                  0.92032400   -2.48775600   -1.94575200
 H                  2.11054300   -3.39757600   -2.90231600
 H                  6.16584900    0.57600400    0.63968700
 H                  1.78663800    2.82833700    1.26497200
 C                  4.21917600   -2.63412600   -1.39285200
 H                  4.56895500   -3.51506000   -1.90567500
 P                 -1.60281500    0.07993800   -0.01730100
 C                 -2.59176200   -0.25853600    1.45411300
 C                 -3.82494500   -0.90918700    1.39320800
 C                 -2.02555400    0.05048400    2.69255900
 C                 -4.49122100   -1.23788900    2.56631100
 H                 -4.26435900   -1.15549000    0.43223000
 C                 -2.69769900   -0.27779600    3.86104700
 H                 -1.06204800    0.55086000    2.72252600
 C                 -3.92957000   -0.92088500    3.79766700
 H                 -5.44977300   -1.74477000    2.51911900
 H                 -2.25976400   -0.03222900    4.82322600
 H                 -4.45368000   -1.17785400    4.71306100
 C                 -2.75939000    0.51013400   -1.33507500
 C                 -3.89181500    1.29467900   -1.11009000
 C                 -2.43349300    0.11380100   -2.63334300
 C                 -4.69444600    1.67222100   -2.17842800
 H                 -4.14732500    1.60728500   -0.10337400
 C                 -3.24121000    0.49068600   -3.69662600
 H                 -1.54518900   -0.49062000   -2.79070700
 C                 -4.37105400    1.26941300   -3.46889200
 H                 -5.57318800    2.28456400   -2.00314800
 H                 -2.98918100    0.17842900   -4.70512400
 H                 -5.00151300    1.56542400   -4.30167200
 N                 -0.62167500   -1.16646400   -0.39308700
 N                 -0.46253000    1.21591200    0.21621900
 C                 -0.92413400   -2.49414100   -0.07494800
 C                 -0.09485900   -3.22181500    0.78605300
 C                 -2.03974800   -3.13852000   -0.62338600
 C                 -0.36913400   -4.54957400    1.08027200
 H                  0.76041200   -2.71313400    1.22140500
 C                 -2.31814700   -4.46374500   -0.31432200
 H                 -2.67877500   -2.59116000   -1.31100100
 C                 -1.48302300   -5.18060700    0.53424000
 H                  0.28632700   -5.09294300    1.75509600
 H                 -3.19057700   -4.94212200   -0.75033700
 H                 -1.69926800   -6.21740700    0.77139200
 C                 -0.66837400    2.59149000    0.09410600
 C                 -1.70533100    3.23871500    0.77677200
 C                  0.17307600    3.35793100   -0.71931400
 C                 -1.90403500    4.60602800    0.63369800
 H                 -2.34285200    2.66340300    1.44221300
 C                 -0.01881500    4.72529900   -0.84303500
 H                  0.97805200    2.85391500   -1.24446000
 C                 -1.06140800    5.35946900   -0.17357600
 H                 -2.71666400    5.08635700    1.17131100
 H                  0.64930200    5.30064700   -1.47727300
 H                 -1.21220300    6.42918400   -0.27848500

69 
7 triplet state, PBE0/6-311*
 Pt                 1.16623900    0.00726600   -0.04487100
 C                  4.90400100   -1.50002200   -0.77072900
 H                  5.95810700   -1.28767900   -0.71214200
 C                  2.68952100    2.50489300    0.95655000
 C                  3.86040000    3.16593700    1.32630900
 C                  5.10031100    2.56852600    1.14240600
 H                  3.79916400    4.15714800    1.76641600
 H                  6.00980700    3.08495800    1.43141800
 N                  3.93940800   -0.64979300   -0.28837400
 C                  2.69433800   -1.15558100   -0.49259700
 C                  2.71671500    1.23528600    0.37694800
 N                  2.89184500   -2.32780500   -1.13359200
 C                  5.17238900    1.28877900    0.60090400
 C                  3.99372000    0.66123700    0.23983400
 C                  1.84597500   -3.18969900   -1.64544600
 H                  1.67114600   -4.03412600   -0.97797900
 H                  0.92849900   -2.61121700   -1.72184700
 H                  2.13312800   -3.54662300   -2.63531000
 H                  6.13361000    0.79706000    0.48094700
 H                  1.73697900    2.99636900    1.12796100
 C                  4.24355800   -2.55818100   -1.30157300
 H                  4.61352900   -3.44782900   -1.78439000
 P                 -1.79165500   -0.08925000    0.04348700
 C                 -2.62632700    0.10058000    1.58797000
 C                 -3.95636500   -0.31503800    1.79295900
 C                 -1.88538300    0.57316900    2.69046900
 C                 -4.53537000   -0.20452700    3.04291500
 H                 -4.51912500   -0.74445600    0.97149400
 C                 -2.47587800    0.66317100    3.94087000
 H                 -0.84892000    0.86679200    2.55550900
 C                 -3.80254300    0.28746000    4.12566400
 H                 -5.56296300   -0.52548800    3.18465700
 H                 -1.89364500    1.03198400    4.78001800
 H                 -4.26069100    0.36129900    5.10655800
 C                 -2.86854600   -0.02224300   -1.32731800
 C                 -4.13350800    0.61822300   -1.32441600
 C                 -2.38631400   -0.53925900   -2.55713500
 C                 -4.89302700    0.66974600   -2.47434600
 H                 -4.50614800    1.08048200   -0.41701300
 C                 -3.15826600   -0.46382300   -3.70122400
 H                 -1.40532000   -1.00299600   -2.58373400
 C                 -4.42098800    0.12772300   -3.67475800
 H                 -5.86436900    1.15523400   -2.44606400
 H                 -2.77219100   -0.87433600   -4.62997100
 H                 -5.02373700    0.17989400   -4.57516100
 N                 -0.56090300   -1.19400100   -0.08393400
 N                 -0.47642200    1.17663800    0.02045100
 C                 -0.74528500   -2.53487000    0.25952400
 C                  0.15565300   -3.16072000    1.13056700
 C                 -1.80737900   -3.29117400   -0.25507000
 C                  0.01168500   -4.50082200    1.45960600
 H                  0.96030500   -2.56464400    1.55065200
 C                 -1.95295000   -4.62890400    0.08994400
 H                 -2.50455700   -2.82450100   -0.94388500
 C                 -1.04358300   -5.24591100    0.94140200
 H                  0.72037200   -4.96233000    2.14161100
 H                 -2.78303900   -5.19622300   -0.32115700
 H                 -1.16037300   -6.29212100    1.20579300
 C                 -0.72413900    2.47999700   -0.28115500
 C                 -1.94911200    3.09844800    0.06484300
 C                  0.24126900    3.23456700   -0.98393700
 C                 -2.18046100    4.41742800   -0.27384600
 H                 -2.68069100    2.54383700    0.63994900
 C                 -0.01244700    4.54722400   -1.32771200
 H                  1.16190400    2.74115300   -1.27308100
 C                 -1.22049200    5.14808000   -0.97271100
 H                 -3.11664300    4.88598900    0.01213500
 H                  0.73307700    5.10903400   -1.88116400
 H                 -1.41351700    6.18186600   -1.24068000

78
8 ground state, PBE0/6-311*
 Pt                 0.19220900   -0.39118300   -0.30682300
 C                  3.28185400   -2.89251200   -1.24604300
 H                  4.35453900   -2.98160500   -1.23843200
 C                  2.36505200    1.60282200    0.53848800
 C                  3.68116500    1.96536600    0.80139400
 C                  4.70474500    1.05789500    0.53301700
 H                  3.90491100    2.94590200    1.21071500
 N                  2.63240700   -1.79143300   -0.73522900
 C                  1.28064000   -1.90837100   -0.85653800
 C                  2.02483800    0.35072800    0.00216600
 N                  1.09240900   -3.09764300   -1.46859900
 C                  4.37827500   -0.20190300    0.01760000
 C                  3.07216100   -0.55474600   -0.24011600
 C                 -0.18805500   -3.62246300   -1.89006300
 H                 -0.54770000   -4.38786700   -1.20085800
 H                 -0.90500200   -2.80478600   -1.90965700
 H                 -0.09112400   -4.04181900   -2.89269600
 H                  1.57586500    2.31519900    0.75075100
 C                  2.31008200   -3.71684200   -1.70365700
 H                  2.37248400   -4.68451100   -2.17363100
 P                 -2.47584200    0.41240400    0.08848600
 C                 -3.30954700    0.38885400    1.68837500
 C                 -4.65320400    0.03682000    1.82466900
 C                 -2.52872800    0.61864300    2.82290200
 C                 -5.21324400   -0.07282400    3.09048300
 H                 -5.25990300   -0.14909800    0.94454700
 C                 -3.09519300    0.51082600    4.08485400
 H                 -1.48258300    0.88299200    2.69903900
 C                 -4.43620500    0.16596100    4.21811500
 H                 -6.25772900   -0.34784700    3.19696700
 H                 -2.48944900    0.69496900    4.96633700
 H                 -4.87740100    0.08076900    5.20640800
 C                 -3.66439700    1.04628600   -1.11241600
 C                 -4.55170100    2.08103300   -0.81184700
 C                 -3.60425100    0.53463000   -2.40991000
 C                 -5.37760100    2.59291300   -1.80380100
 H                 -4.59933900    2.48351700    0.19431100
 C                 -4.43438900    1.04746400   -3.39615300
 H                 -2.90300500   -0.26546900   -2.62731200
 C                 -5.32051400    2.07592700   -3.09281300
 H                 -6.06557100    3.39916100   -1.57036000
 H                 -4.38985700    0.64637800   -4.40371700
 H                 -5.96838000    2.47786300   -3.86566500
 N                 -1.86998000   -1.05039000   -0.30368700
 N                 -1.08066700    1.24868100    0.09698700
 C                 -2.42908500   -2.24867800    0.15448200
 C                 -1.69713800   -3.09705800    0.99247000
 C                 -3.71631900   -2.64266600   -0.22957400
 C                 -2.23303100   -4.30203800    1.42344800
 H                 -0.70470200   -2.77999200    1.29951000
 C                 -4.25398700   -3.84343400    0.21601700
 H                 -4.28569100   -2.00188400   -0.89739100
 C                 -3.51531200   -4.68396700    1.04021300
 H                 -1.64808800   -4.94286200    2.07714600
 H                 -5.25555300   -4.12812600   -0.09354700
 H                 -3.93484600   -5.62404800    1.38397100
 C                 -0.97273600    2.62440800   -0.11727000
 C                 -1.72823200    3.54005200    0.62478300
 C                 -0.09229400    3.11768300   -1.08599600
 C                 -1.61845300    4.90480200    0.39047700
 H                 -2.38790800    3.17365900    1.40635300
 C                  0.02685400    4.48191000   -1.30183900
 H                  0.49382800    2.40542300   -1.65781100
 C                 -0.73865300    5.38572900   -0.57084200
 H                 -2.21648900    5.59678600    0.97660400
 H                  0.71960000    4.84229000   -2.05671100
 H                 -0.64743000    6.45267200   -0.74776900
 C                  6.14533400    1.04557600    0.66076800
 C                  7.11121800    1.94974400    1.09705900
 C                  6.55591800   -0.21873000    0.21318500
 C                  8.44517000    1.56490400    1.07229400
 H                  6.82653200    2.93608700    1.44930800
 C                  7.87585700   -0.62173100    0.18023200
 C                  8.82273200    0.29768800    0.62058500
 H                  9.20903700    2.25840600    1.40898900
 H                  8.15413400   -1.60853700   -0.17249600
 H                  9.87258900    0.02311200    0.61210200
 O                  5.48782500   -0.98364800   -0.17895200
 
78
8 triplet state, PBE0/6-311*
 Pt                 0.19168900   -0.35868900   -0.39423900
 C                  3.25173400   -2.97908700   -1.15110700
 H                  4.31962200   -3.10260200   -1.10130900
 C                  2.32747600    1.60602500    0.52344400
 C                  3.62538700    1.97141800    0.78299700
 C                  4.69170900    1.02328800    0.49859600
 H                  3.86284700    2.94441700    1.19702700
 N                  2.62383800   -1.82026300   -0.73004300
 C                  1.25821700   -1.91006500   -0.89785900
 C                  1.97239800    0.34731500   -0.01602900
 N                  1.06035200   -3.13447600   -1.44530000
 C                  4.37069700   -0.24651300   -0.01307600
 C                  3.08057600   -0.61854400   -0.25921000
 C                 -0.21473500   -3.64278200   -1.89984700
 H                 -0.65975100   -4.31560200   -1.16526500
 H                 -0.88613800   -2.80058900   -2.05365700
 H                 -0.07478500   -4.16748300   -2.84620200
 H                  1.53304700    2.31481100    0.73059000
 C                  2.26583600   -3.79369500   -1.59511100
 H                  2.31793200   -4.78499600   -2.01530100
 P                 -2.45191100    0.43502300    0.11243400
 C                 -3.08708400    0.29756400    1.79580800
 C                 -4.31740700   -0.30412800    2.07040000
 C                 -2.24990800    0.68672000    2.84194100
 C                 -4.70979000   -0.50122800    3.38687000
 H                 -4.96219300   -0.62480800    1.25844400
 C                 -2.65151700    0.49219500    4.15678700
 H                 -1.28764800    1.13311900    2.60952700
 C                 -3.87968100   -0.10004400    4.42836500
 H                 -5.66350700   -0.97294300    3.60084000
 H                 -2.00273100    0.80031000    4.97042900
 H                 -4.19051300   -0.25441600    5.45707300
 C                 -3.78543000    1.09640500   -0.90626900
 C                 -4.79690100    1.90952200   -0.39555600
 C                 -3.72806600    0.83065700   -2.27634100
 C                 -5.75022100    2.44671000   -1.25093300
 H                 -4.84166100    2.11821100    0.66835900
 C                 -4.68210400    1.37013900   -3.12598400
 H                 -2.93314300    0.19767600   -2.65915600
 C                 -5.69307200    2.17696500   -2.61289900
 H                 -6.53720600    3.07963400   -0.85356000
 H                 -4.63768900    1.16373700   -4.19056400
 H                 -6.43878400    2.59919500   -3.27937500
 N                 -1.87584200   -0.99945400   -0.42244500
 N                 -1.07772900    1.29366400    0.01295800
 C                 -2.44283700   -2.21290400    0.00040100
 C                 -1.81385900   -2.99340400    0.97544400
 C                 -3.63905100   -2.67473800   -0.55773100
 C                 -2.36077500   -4.20562300    1.37141600
 H                 -0.89036700   -2.62254900    1.41019400
 C                 -4.18802300   -3.88548200   -0.15259900
 H                 -4.12562900   -2.07502200   -1.32165600
 C                 -3.55050700   -4.66001800    0.80971100
 H                 -1.85898500   -4.79599100    2.13264900
 H                 -5.11644700   -4.22925100   -0.59953600
 H                 -3.97784800   -5.60762200    1.12205000
 C                 -0.99006600    2.66621400   -0.21312300
 C                 -1.79621600    3.57565000    0.48284900
 C                 -0.07727600    3.16722400   -1.14826600
 C                 -1.70636200    4.93880200    0.23383700
 H                 -2.48394300    3.20758400    1.23909800
 C                  0.02092800    4.53074600   -1.37725000
 H                  0.54935800    2.46190600   -1.68473300
 C                 -0.79556200    5.42748300   -0.69403400
 H                 -2.34620400    5.62390300    0.78265200
 H                  0.73905700    4.89607800   -2.10559800
 H                 -0.71924500    6.49381100   -0.88104900
 C                  6.09271000    1.03724100    0.62667500
 C                  7.05135900    1.97338400    1.07073200
 C                  6.54655600   -0.23409600    0.18469700
 C                  8.38467000    1.60846200    1.05307700
 H                  6.74515300    2.95500500    1.41603000
 C                  7.86728200   -0.60660000    0.16420400
 C                  8.79606400    0.34315000    0.60886900
 H                  9.13560300    2.31621300    1.39039500
 H                  8.17130200   -1.58859400   -0.18011300
 H                  9.85164400    0.09343800    0.60882600
 O                  5.49232200   -1.01330500   -0.20531800

 
